# Supplementary material for: Chemical Compositions and Experimental and Computational Modeling of the Anticancer Effects of Cnidocyte Venoms of Jellyfish Cassiopea andromeda and Catostylus mosaicus on Human Adenocarcinoma A549 Cells
Source: MDPI journal article supplement (doi:10.3390/md21030168), 2023-03-07
Supplement: s1 [file s1]

**Chemical compositions and experimental and computational modeling of anticancer effects of cnidocyte venoms of jellyfish *Cassiopea andromeda* and *Catostylus mosaicus* on human adenocarcinoma A549 cells**

Afshin Zare<sup>1</sup>, Alireza Afshar<sup>2</sup>, Arezoo Khoradmehr<sup>3</sup>, Neda Baghban<sup>3</sup>, Gholamhossein Mohebbi<sup>3</sup>, Alireza Barmak<sup>4</sup>, Adel Daneshi<sup>3</sup>, Afshar Bargahi<sup>3</sup>, Iraj Nabipour<sup>3</sup>, Sahar Almasi-turk<sup>5,\*</sup>, Alireza Arandian<sup>6</sup>, Mohammad Ismail Zibaii<sup>6</sup>, Hamid Latifi<sup>6,7</sup>, Amin Tamadon<sup>2,\*</sup>

1- Bushehr University of Medical Sciences, Bushehr, Iran

2- PerciaVista R&D Co. Shiraz, Iran

3- The Persian Gulf Marine Biotechnology Research Center, The Persian Gulf Biomedical Sciences Research Institute, Bushehr University of Medical Sciences, Bushehr, Iran

4- Food Lab, Bushehr University of Medical Sciences, Bushehr, Iran

5- Department of Anatomical Sciences, School of Medicine, Bushehr University of Medical Sciences, Bushehr, Iran

6- Laser and Plasma Research Institute, Shahid Beheshti University, Tehran, Iran

7- Department of Physics, Shahid Beheshti University, Tehran, Iran

**\*Correspondences:**

Amin Tamadon, DVM, PhD; The PerciaVista Biotechnology Company, Shiraz, Iran; Postal Code: 7514633196; Tel/fax: +98-21-2842-6122; Email: amintamaddon@yahoo.com

Sahar Almasi-turk, PhD; Department of Anatomical Sciences, Bushehr University of Medical Sciences, Bushehr, Iran; Postal Code: 7518759577; Tel./fax: +98-77-3332-0657 Email: s.almasi@bpums.ac.ir

***C. andromeda***

File :E:\1400\research\catecilus\catecilus.D  
Operator : zola-PC\zola  
Acquired : 26 Jul 2021 12:18 usingAcqMethod Pesticides.M  
Instrument : GCMSD Online  
Sample Name: catecilus  
Misc Info :  
Val Number: 1

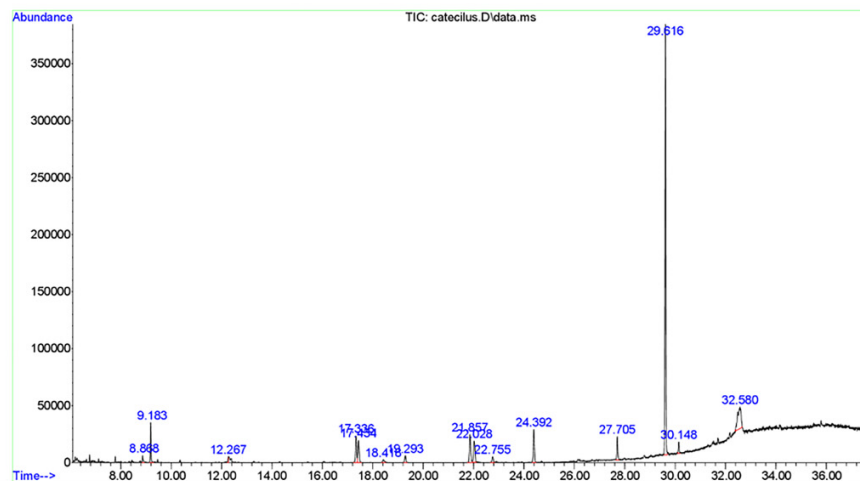

***C. mosaicus***

File :E:\1400\research\casopia1\casopia.D  
Operator : zola-PC\zola  
Acquired : 26 Jul 2021 1:31 usingAcqMethod Pesticides.M  
Instrument : GCMSD Online  
Sample Name: casopia  
Misc Info :  
Val Number: 1

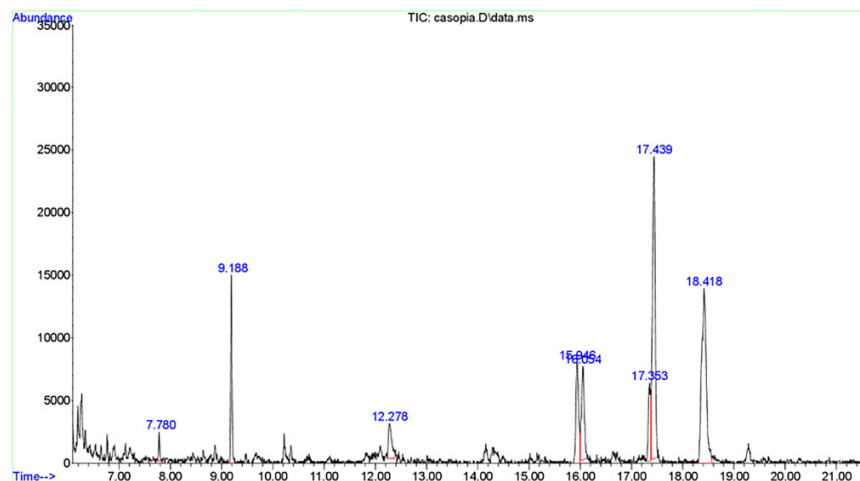

**Figure S1.**  
GC-MS chromatogram of the venom of *Cassiopea andromeda* and *Catostylus mosaicus*

**Table S1.**GC-MS-detected compounds in the venom of *Cassiopea andromeda*

| Compounds                                                                        | Formula   | Effects                                                                                           | MW     | RT    | Abundance ratio (%) | Cancer/Cell line                               | References |
|----------------------------------------------------------------------------------|-----------|---------------------------------------------------------------------------------------------------|--------|-------|---------------------|------------------------------------------------|------------|
| Ethaneperoxoic acid, 1-cyano-1-[2-(2-phenyl-1,3-dioxolan-2-yl)ethyl]pentyl ester | C19H25NO5 | Anticancer<br>Antimicrobial<br>Anti-inflammatory                                                  | 347.4  | 15.94 | 1.098               | MCF-7                                          | [1-3]      |
| Dibutyl phthalate                                                                | C16H22O4  | Anticancer<br>Antimicrobial<br>Induce apoptosis<br>Induce inflammation<br>Induce oxidative stress | 278.34 | 18.41 | 3.153               | Brain<br>Breast<br>Lung<br>Prostate<br>Bladder | [4-6]      |
| 9,12-Octadecadienoic acid, methyl ester                                          | C19H34O2  | Anticancer<br>Antioxidant<br>Antimicrobial<br>Anti-inflammatory                                   | 294.5  | 21.86 | 4.852               | B16<br>Eca-109<br>BGC823<br>HeLa<br>NCTC1469   | [7-10]     |
| 6-Octadecenoic acid, methyl ester, (Z)-                                          | C19H36O2  | Antioxidant<br>Antimicrobial<br>Antiviral                                                         | 296.5  | 22.03 | 3.575               | NA                                             | [11-13]    |
| Heptadecane,2,6,10,14-Tetramethyl-                                               | C21H44    | Anticancer<br>Antioxidant                                                                         | 296.6  | 24.4  | 0.775               | LnCap<br>22RV1<br>MDA-MB-231<br>MCF7           | [14]       |
| 1-Hexadecyne                                                                     | C16H30    | Antimicrobial                                                                                     | 222.41 | 26.13 | 0.451               | NA                                             | [15]       |

|                                                                                               |            |                                                      |        |       |        |          |         |
|-----------------------------------------------------------------------------------------------|------------|------------------------------------------------------|--------|-------|--------|----------|---------|
| Nonadecane                                                                                    | C19H40     | Antioxidant                                          | 268.5  | 27.7  | 1.176  | NA       | [16]    |
| Batilol                                                                                       | C21H44O3   | Anti-inflammatory<br>Anticancer<br>Anti-inflammatory | 344.6  | 30.14 | 0.506  | Leukemia | [17,18] |
| 2-Bromononane                                                                                 | C9H19Br    | NA                                                   | 207.15 | 7.78  | 0.123  | NA       | NA      |
| Tetradecanoic acid, 12-methyl-, methyl ester, (S)-                                            | C16H32O2   | NA                                                   | 256.42 | 22.77 | 0.880  | NA       | NA      |
| Androst-11-en-17-one, 3-formyloxy-, (3a',5a')-                                                | C20H28O3   | NA                                                   | 316.4  | 31.14 | 4.701  | NA       | NA      |
| Pseudo-sarsapogenin-5,20-dien                                                                 | C27H42O3   | NA                                                   | 414.6  | 32.6  | 29.621 | NA       | NA      |
| 1,3-Dioxolane-2-heptanenitrile, alpha-methyl- $\alpha$ -oxo-2-phenyl-                         | C17H21NO3  | NA                                                   | 287.35 | 16.05 | 0.998  | NA       | NA      |
| Aspidofractinine-3-methanol, (2a',3a',5a')-                                                   | C22H28N2O2 | NA                                                   | 352.5  | 29.62 | 42.856 | NA       | NA      |
| 1,4,5,6-Tetrahydrocyclopentapyrazole-3-carboxylic acid, (1-adamantan-1-ylethylidene)hydrazide | C19H26N4O  | NA                                                   | 326.4  | 9.18  | 0.927  | NA       | NA      |
| 3 $\beta$ -hydroxyallobetulane                                                                | C30H50O2   | NA                                                   | 442.7  | 17.43 | 3.165  | NA       | NA      |
| 3-oxo-18-nor-ent-ros-4-ene-15 $\beta$ ,16-acetonide                                           | C22H34O3   | NA                                                   | 346.5  | 17.35 | 0.687  | NA       | NA      |
| Cholestan-22(26)-isoeipoxy                                                                    | C27H42O1   | NA                                                   | 414.6  | 12.27 | 0.457  | NA       | NA      |

**Table S2.**GC-MS-detected compounds in the venom of *Catostylus mosaicus*

| Compounds                               | Formula  | Effects                                                                                                                     | MW     | RT    | Abundance ratio (%) | Cancer/Cancer cell line                        | References |
|-----------------------------------------|----------|-----------------------------------------------------------------------------------------------------------------------------|--------|-------|---------------------|------------------------------------------------|------------|
| Citrinin                                | C13H14O5 | Anticancer<br>Antioxidant<br>Antimicrobial<br>Anti-inflammatory<br>Induce apoptosis<br>Induce oxidative stress<br>Antiviral | 250.25 | 17.33 | 4.402               | MCF-7<br>LNCaP<br>LU-1<br>KB                   | [19-24]    |
| Dibutyl phthalate                       | C16H22O4 | Anticancer<br>Antimicrobial<br>Induce apoptosis<br>Induce inflammation<br>Induce oxidative stress                           | 278.34 | 18.41 | 0.746               | Brain<br>Breast<br>Lung<br>Prostate<br>Bladder | [4-6]      |
| Eicosane                                | C20H42   | Anticancer<br>Antimicrobial<br>Anti-inflammatory<br>Antiviral                                                               | 282.5  | 19.29 | 1.269               | HeLa<br>MCF7<br>SGC-7901                       | [25-29]    |
| 9,12-Octadecadienoic acid, methyl ester | C19H34O2 | Anticancer<br>Antioxidant<br>Antimicrobial                                                                                  | 294.5  | 21.85 | 5.552               | B16<br>Eca-109<br>BGC823 HeLa<br>NCTC1469      | [7-10]     |

|                                                                                               |            |                                                   |        |       |        |                                   |         |
|-----------------------------------------------------------------------------------------------|------------|---------------------------------------------------|--------|-------|--------|-----------------------------------|---------|
| 6-Octadecenoic acid, methyl ester, (Z)-                                                       | C19H36O2   | Anti-inflammatory<br>Antioxidant<br>Antimicrobial | 296.5  | 22.03 | 4.480  | NA                                | [11-13] |
| Heptadecane,2,6,10,14-Tetramethyl-                                                            | C21H44     | Anticancer<br>Antioxidant                         | 296.6  | 24.4  | 5.221  | LnCap 22RV1<br>MDA-MB-231<br>MCF7 | [14]    |
| Nonadecane                                                                                    | C19H40     | Antioxidant<br>Anti-inflammatory                  | 268.5  | 27.7  | 3.297  | NA                                | [16]    |
| Batilol                                                                                       | C21H44O3   | Anticancer<br>Anti-inflammatory                   | 344.6  | 30.14 | 1.397  | Leukemia                          | [17,18] |
| Decane, 1-bromo-2-methyl-                                                                     | C11H23Br   | NA                                                | 235.20 | 8.86  | 0.791  | NA                                | NA      |
| 3β-hydroxyallobetulane                                                                        | C30H50O2   | NA                                                | 442.7  | 17.43 | 3.961  | NA                                | NA      |
| Aspidofractinine-3-methanol, (2a',3a',5a')-                                                   | C22H28N2O2 | NA                                                | 352.5  | 29.62 | 52.603 | NA                                | NA      |
| Tetradecanoic acid, 12-methyl-, methyl ester, (S)-                                            | C16H32O2   | NA                                                | 256.42 | 22.76 | 1.145  | NA                                | NA      |
| 1,4,5,6-Tetrahydrocyclopentapyrazole-3-carboxylic acid, (1-adamantan-1-ylethylidene)hydrazide | C19H26N4O  | NA                                                | 326.4  | 9.18  | 3.912  | NA                                | NA      |
| Cholestan-22(26)-isoepoxy                                                                     | C27H42O1   | NA                                                | 414.6  | 12.26 | 0.609  | NA                                | NA      |
| Pseudoarsasapogenin-5,20-dien                                                                 | C27H42O3   | NA                                                | 414.6  | 32.6  | 10.616 | NA                                | NA      |

**Table S3.**

Receptors involve in the apoptosis of cells of human pulmonary adenocarcinoma cells (A59).

| Receptor                                                               | Type of effect on the apoptosis in A549 cells | Ref. |
|------------------------------------------------------------------------|-----------------------------------------------|------|
| Fas receptor                                                           | Activation                                    | [30] |
| TNF receptor-1(TNF-R1)                                                 | Activation                                    | [30] |
| Death receptor 4 (DR4 or TRAIL-R1)                                     | Activation                                    | [31] |
| Insulin-like growth factor 1 receptor (IGF1R)                          | Activation                                    | [32] |
| Peroxisome proliferator-activated receptor- $\gamma$ (PPAR- $\gamma$ ) | Activation                                    | [33] |
| Caspase-8                                                              | Activation                                    | [34] |
| Caspase-3                                                              | Activation                                    |      |
| Caspase-9                                                              | Activation                                    |      |
| Caspase-7                                                              | Activation                                    | [35] |
| Cannabinoid receptor type 1 (CB1)                                      | Activation                                    | [36] |
| Cannabinoid receptor type 2 (CB2)                                      |                                               |      |
| Toll-like receptor 4 (TLR4)                                            | Activation                                    | [37] |
| Toll-like receptor 9 (TLR9)                                            | Activation                                    | [38] |
| Blockade of Endothelial protein C receptor (EPCR)                      | Inhibition                                    | [39] |
| Metabotropic glutamate receptors (mGluRs)                              | Activation                                    | [40] |
| Prostaglandin D2 (PGD2) receptor                                       | Activation                                    | [41] |
| Transforming Growth Factor Beta Receptor 2 (TGFB $\beta$ 2)            | Activation                                    | [42] |

**Western blot original gels.**

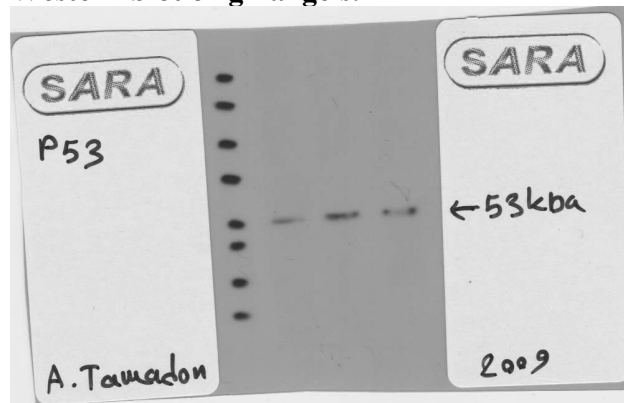

Western blot gel P53

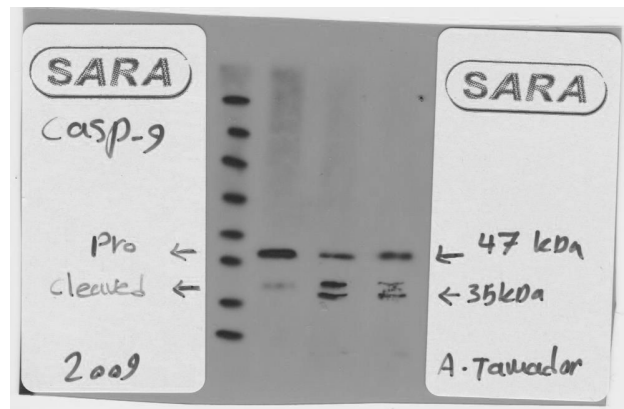

Western blot gel caspase-9



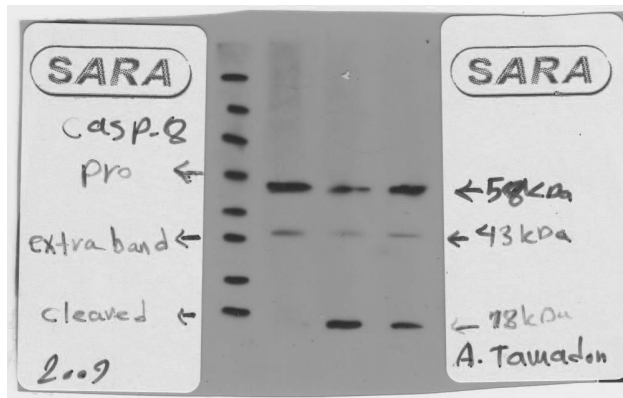

Western blot gel caspase-8

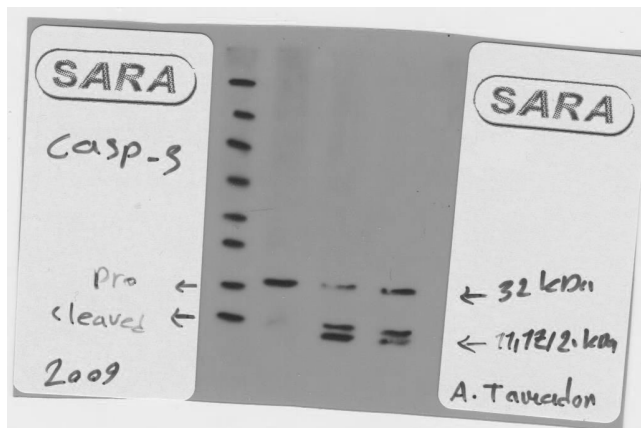

Western blot gel caspase-3

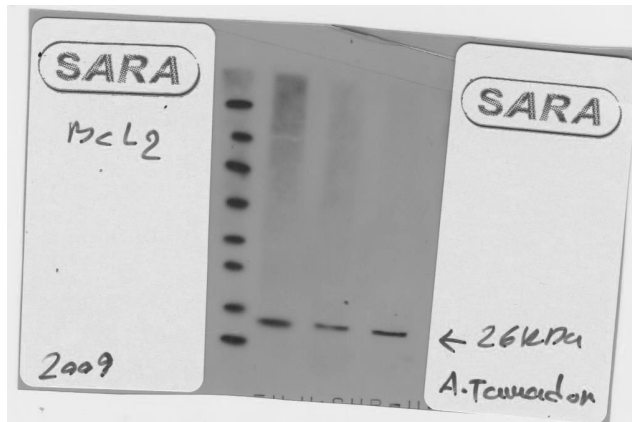

Western blot gel BCL-2

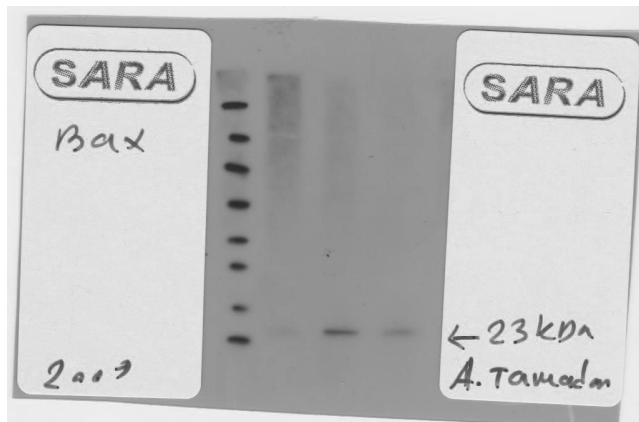

Western blot gel BAX

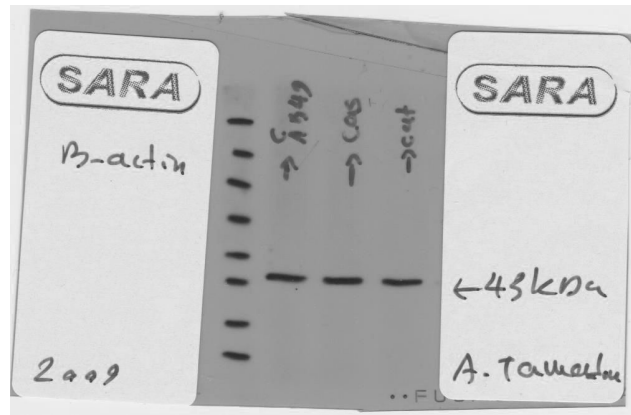

Western blot gel  $\beta$ -actin

## References

1. Sathyaprabha, G.; Panneerselvam, A.; Kumaravel, S. Bioactive compounds identification of *Pleurotus platypus* and *Pleurotus eous* by GC-MS. *Adv. Appl. Sci. Res.* **2011**, *2*, 51-54.
2. Bekele, D.; Tekie, H.; Asfaw, Z.; Petros, B. Bioactive chemical constituents from the leaf of *Oreosyce africana* Hook. f (Cucurbitaceae) with mosquitocidal activities against adult *Anopheles arabiensis*, the principal malaria vector in Ethiopia. *J. fertil. pestic.* **2016**, *7*, doi:10.4172/2471-2728.1000159.
3. Maharajasri, V.; Devamalar, D. Characterization of antibacterial, anticancer properties and bioactive compounds of methanolic leaf extract of *Catharanthus roseus*. *Int. J. Humanit. Arts Med. Sci.* **2015**, *1*, 35-42.
4. Roy, R.N. Bioactive natural derivatives of phthalate ester. *Crit. Rev. Biotechnol.* **2020**, *40*, 913-929, doi:10.1080/07388551.2020.1789838.
5. Malik, S.K.; Ahmed, M.; Khan, F. Identification of novel anticancer terpenoids from *Prosopis juliflora* (Sw) DC (Leguminosae) pods. *Trop. J. Pharm. Res.* **2018**, *17*, 661-668, doi:10.4314/tjpr.v17i4.14.
6. Cui, Y.; Zhang, X.; Yin, K.; Qi, X.; Zhang, Y.; Zhang, J.; Li, S.; Lin, H. Dibutyl phthalate-induced oxidative stress, inflammation and apoptosis in grass carp hepatocytes and the therapeutic use of taxifolin. *Sci. Total Environ.* **2021**, *764*, 10, doi:10.1016/j.scitotenv.2020.142880.
7. Yang, Y.; Fu, C.; Zhou, F.; Luo, X.; Li, J.; Zhao, J.; He, J.; Li, X.; Li, J. Chemical composition, antioxidant and antitumor activities of sub-fractions of wild and cultivated *Pleurotus ferulae* ethanol extracts. *PeerJ* **2018**, *6*, e6097, doi:10.7717/peerj.6097.
8. Sutanto, H.; Ainny, L.; Susanto, B.H.; Nasikin, M. Reaction product of pyrogallol with methyl linoleate and its antioxidant potential for biodiesel. In Proceedings of the IOP Conference Series: Materials Science and Engineering, 2018; p. 012019.
9. Batalha, M.M.C.; Goulart, H.F.; Santana, A.E.G.; Barbosa, L.A.O.; Nascimento, T.G.; da Silva, M.K.H.; Dornelas, C.B.; Grillo, L.A.M. Chemical composition and antimicrobial activity of cuticular and internal lipids of the insect *Rhynchophorus palmarum*. *Arch. Insect. Biochem. Physiol.* **2020**, *105*, e21723, doi:10.1002/arch.21723.
10. El-anssary, A.A.; Raoof, G.F.A.; Saleh, D.O.; El-Masry, H.M. Bioactivities, physicochemical parameters and GC/MS profiling of the fixed oil of *Cucumis melo* L seeds: A focus on anti-inflammatory, immunomodulatory, and antimicrobial activities. *J. HerbMed Pharmacol.* **2021**, *10*, 476-485, doi:10.34172/jhp.2021.55.
11. Marie Elvire, N.; Hortense, G.; Emmanuel, N.; Rose, N.; Francine, M. Evaluation of the in vitro antibacterial activity of *Azadirachta indica* used for the treat-ment of alveolitis. *Int. J. Biopharm. Sci.* **2020**, *2*, 119, doi:10.31021/ijbs.20203119.
12. Dadwal, V.; Agrawal, H.; Sonkhla, K.; Joshi, R.; Gupta, M. Characterization of phenolics, amino acids, fatty acids and antioxidant activity in pulp and seeds of high altitude *Himalayan crab* apple fruits (*Malus baccata*). *J. Food Sci. Technol.* **2018**, *55*, 2160-2169, doi:10.1007/s13197-018-3133-y.

13. Khiralla, A.; Spina, R.; Varbanov, M.; Philippot, S.; Lemiere, P.; Sle Zack-Deschaumes, S.; Andre, P.; Mohamed, I.; Yagi, S.M.; Laurain-Mattar, D. Evaluation of antiviral, antibacterial and antiproliferative activities of the endophytic fungus *Curvularia papendorfii*, and isolation of a new polyhydroxyacid. *Microorganisms* **2020**, *8*, 1353, doi:10.3390/microorganisms8091353.
14. El Fakir, L.; Bouothmany, K.; Alotaibi, A.; Bourhia, M.; Ullah, R.; Zahoor, S.; El Mzibri, M.; Gmouh, S.; Alaoui, T.; Zaid, A. Antioxidant and understanding the anticancer properties in human prostate and breast cancer cell lines of chemically characterized methanol extract from *Berberis hispanica* Boiss. & Reut. *Appl. Sci.* **2021**, *11*, 3510, doi:10.3390/app11083510.
15. Adenola, O.; Adeleke, S. Determination of bioactive compounds and antimicrobial capabilities of purified *Nymphaea lotus* Linn. (Nymphaeaceae) extract to multidrug resistant enteric bacteria. *J. Altern. Complement. Med.* **2021**, *13*, 39-53, doi:10.9734/JOCAMR/2021/v13i230222.
16. Kazemi, M. Phenolic profile, antioxidant capacity and anti-inflammatory activity of *Anethum graveolens* L. essential oil. *Nat. Prod. Res.* **2015**, *29*, 551-553, doi:10.1080/14786419.2014.951934.
17. Burford, R.G.; Gowdey, C.W. Anti-inflammatory activity of alkoxyglycerols in rats. *Arch. Int. Pharmacodyn. Ther.* **1968**, *173*, 56-70.
18. Ge, G.F.; Yu, C.H.; Yu, B.; Shen, Z.H.; Zhang, D.L.; Wu, Q.F. Antitumor effects and chemical compositions of *Eupolyphaga sinensis* walker ethanol extract. *J. Ethnopharmacol.* **2012**, *141*, 178-182, doi:10.1016/j.jep.2012.02.016.
19. de Oliveira Filho, J.W.G.; Islam, M.T.; Ali, E.S.; Uddin, S.J.; Santos, J.V.O.; de Alencar, M.; Junior, A.L.G.; Paz, M.; de Brito, M.; JMC, E.S.; et al. A comprehensive review on biological properties of citrinin. *Food Chem. Toxicol.* **2017**, *110*, 130-141, doi:10.1016/j.fct.2017.10.002.
20. Kumar, R.; Dwivedi, P.D.; Dhawan, A.; Das, M.; Ansari, K.M. Citrinin-generated reactive oxygen species cause cell cycle arrest leading to apoptosis via the intrinsic mitochondrial pathway in mouse skin. *Toxicol. Sci.* **2011**, *122*, 557-566, doi:10.1093/toxsci/kfr143.
21. Heider, E.M.; Harper, J.K.; Grant, D.M.; Hoffman, A.; Dugan, F.; Tomer, D.P.; O'Neill, K.L. Exploring unusual antioxidant activity in a benzoic acid derivative: a proposed mechanism for citrinin. *Tetrahedron* **2006**, *62*, 1199-1208, doi:10.1016/j.tet.2005.10.066.
22. Sharath Babu, G.R.; Anand, T.; Ilaiyaraja, N.; Khanum, F.; Gopalan, N. Pelargonidin modulates Keap1/Nrf2 pathway gene expression and ameliorates citrinin-induced oxidative stress in HepG2 cells. *Front. Pharmacol.* **2017**, *8*, 868, doi:10.3389/fphar.2017.00868.
23. de Sousa Oliveira, K.; Queiroz, P.R.M.; Fensterseifer, I.C.M.; Migliolo, L.; Oliveira, A.L.; Franco, O.L. Purified citritin in combination with vancomycin inhibits VRE in vitro and in vivo. *Microbiology* **2017**, *163*, 1525-1531, doi:10.1099/mic.0.000547.

24. Shams ul Hassan, S.; Ishaq, M.; Zhang, W.-d.; Jin, H.-Z. An overview of the mechanisms of marine fungi-derived anti-inflammatory and anti-tumor agents and their novel role in drug targeting. *Curr. Pharm. Des.* **2021**, *27*, 2605-2614, doi:10.2174/1381612826666200728142244.
25. Vats, S.; Gupta, T. Evaluation of bioactive compounds and antioxidant potential of hydroethanolic extract of *Moringa oleifera* Lam. from Rajasthan, India. *Physiol. Mol. Biol. Plants* **2017**, *23*, 239-248, doi:10.1007/s12298-016-0407-6.
26. Saleh, E.I.M.M.; Bhattacharyya, P.; Van Staden, J. Chemical composition and cytotoxic activity of the essential oil and oleoresins of in vitro micropropagated *Ansellia africana* Lindl: A vulnerable medicinal orchid of Africa. *Molecules* **2021**, *26*, 4556, doi:10.3390/molecules26154556.
27. Elmosallamy, A.; Ibraheem, E.; Sarhan, M.; Hussein, S.A.A. Chemical and biological activities of *Deverra triradiata* Hochst. ex. Boiss. Aerial parts from St. Catherine, southern Sinai, Egypt. *Egypt. J. Chem.* **2021**, *64*, 1387-1394, doi:10.21608/EJCHEM.2020.52846.3092.
28. Okechukwu, P. Evaluation of anti-inflammatory, analgesic, antipyretic effect of eicosane, pentadecane, octacosane, and heneicosane. *Asian J. Pharm. Clin. Res.* **2020**, *13*, 29-35, doi:10.22159/ajpcr.2020.v13i4.36196
29. Chathuranga, K.; Weerawardhana, A.; Dodantenna, N.; Ranathunga, L.; Cho, W.K.; Ma, J.Y.; Lee, J.S. Inhibitory effect of *Sargassum fusiforme* and its components on replication of respiratory syncytial virus in vitro and in vivo. *Viruses* **2021**, *13*, 548, doi:10.3390/v13040548.
30. Zhao, C.; Gao, W.; Chen, T. Synergistic induction of apoptosis in A549 cells by dihydroartemisinin and gemcitabine. *Apoptosis* **2014**, *19*, 668-681, doi:10.1007/s10495-013-0953-0.
31. Lu, J.; Chen, J.; Kang, Y.; Wu, J.; Shi, H.; Fu, Y.; Jiao, L.; Dong, C.; Li, X.; Jin, Y. Jinfukang induces cellular apoptosis through activation of Fas and DR4 in A549 cells. *Oncol. Lett.* **2018**, *16*, 4343-4352, doi:10.3892/ol.2018.9149.
32. Dong, A.; Kong, M.; Ma, Z.; Qian, J.; Cheng, H.; Xu, X. Knockdown of insulin-like growth factor 1 receptor enhances chemosensitivity to cisplatin in human lung adenocarcinoma A549 cells. *Acta Biochim. Biophys. Sin.* **2008**, *40*, 497-504, doi:10.1111/j.1745-7270.2008.00429.x.
33. Mao, J.T.; Nie, W.-X.; Tsu, I.; Jin, Y.-S.; Rao, J.Y.; Lu, Q.-Y.; Zhang, Z.-F.; Go, V.L.W.; Serio, K.J. White tea extract induces apoptosis in non-small cell lung cancer cells: The role of peroxisome proliferator-activated receptor- $\gamma$  and 15-lipoxygenase. White tea induces apoptosis in human lung cancer cells. *Cancer Prev. Res.* **2010**, *3*, 1132-1140, doi:10.1158/1940-6207.CAPR-09-0264.
34. Lin, M.; Tang, S.; Zhang, C.; Chen, H.; Huang, W.; Liu, Y.; Zhang, J. Euphorbia factor L2 induces apoptosis in A549 cells through the mitochondrial pathway. *Acta Pharm. Sin. B* **2017**, *7*, 59-64, doi:10.1016/j.apsb.2016.06.008.
35. Moghadamtousi, S.Z.; Kadir, H.A.; Paydar, M.; Rouhollahi, E.; Karimian, H. Annona muricata leaves induced apoptosis in A549 cells through mitochondrial-mediated pathway and involvement of NF- $\kappa$ B. *BMC Complement. Altern. Med.* **2014**, *14*, 1-13, doi:10.1186/1472-6882-14-299.

36. Preet, A.; Qamri, Z.; Nasser, M.W.; Prasad, A.; Shilo, K.; Zou, X.; Groopman, J.E.; Ganju, R.K. Cannabinoid receptors, CB1 and CB2, as novel targets for inhibition of non-small cell lung cancer growth and metastasis cannabinoid receptors in NSCLC treatment. *Cancer Prev. Res.* **2011**, *4*, 65-75, doi:10.1158/1940-6207.CAPR-10-0181.
37. Hsu, H.-Y.; Lin, T.-Y.; Lu, M.-K.; Leng, P.-J.; Tsao, S.-M.; Wu, Y.-C. Fucoidan induces Toll-like receptor 4-regulated reactive oxygen species and promotes endoplasmic reticulum stress-mediated apoptosis in lung cancer. *Sci. Rep.* **2017**, *7*, 1-13, doi:10.1038/srep44990.
38. Yuan, S.; Qiao, T.; Li, X.; Zhuang, X.; Chen, W.; Chen, X.; Zhang, Q. Toll-like receptor 9 activation by CpG oligodeoxynucleotide 7909 enhances the radiosensitivity of A549 lung cancer cells via the p53 signaling pathway. *Oncol. Lett.* **2018**, *15*, 5271-5279, doi:10.3892/ol.2018.7916.
39. Antón, I.; Molina, E.; Luis-Ravelo, D.; Zanduetta, C.; Valencia, K.; Ormazabal, C.; Martínez-Canarias, S.; Perurena, N.; Pajares, M.J.; Agorreta, J. Receptor of activated protein C promotes metastasis and correlates with clinical outcome in lung adenocarcinoma. *Am. J. Respir. Crit. Care Med.* **2012**, *186*, 96-105, doi:10.1164/rccm.201110-1826OC.
40. Li, T.-J.; Huang, Y.-H.; Chen, X.; Zhou, Z.; Luo, S.-W.; Feng, D.-D.; Han, J.-Z.; Luo, Z.-Q. Metabotropic glutamate receptor 8 activation promotes the apoptosis of lung carcinoma A549 cells in vitro. *Sheng Li Xue Bao* **2015**, *67*, 513-520.
41. Wang, J.J.; Mak, O.T. Induction of apoptosis in non-small cell lung carcinoma A549 cells by PGD2 metabolite, 15d-PGJ2. *Cell Biol. Int.* **2011**, *35*, 1089-1096, doi:10.1042/CBI20110707.
42. Tarfie, G.A.; Shadboorestan, A.; Montazeri, H.; Rahmanian, N.; Tavosi, G.; Ghahremani, M.H. GDF15 induced apoptosis and cytotoxicity in A549 cells depends on TGFBR2 expression. *Cell Biochem. Funct.* **2019**, *37*, 320-330, doi:10.1002/cbf.3391.
